# Supplementary material
Source: Springer Nature journal article supplement (https://www.springermedizin.de/resource/supplementary/12935_2011_325_MOESM1_ESM.pdf/9540368)

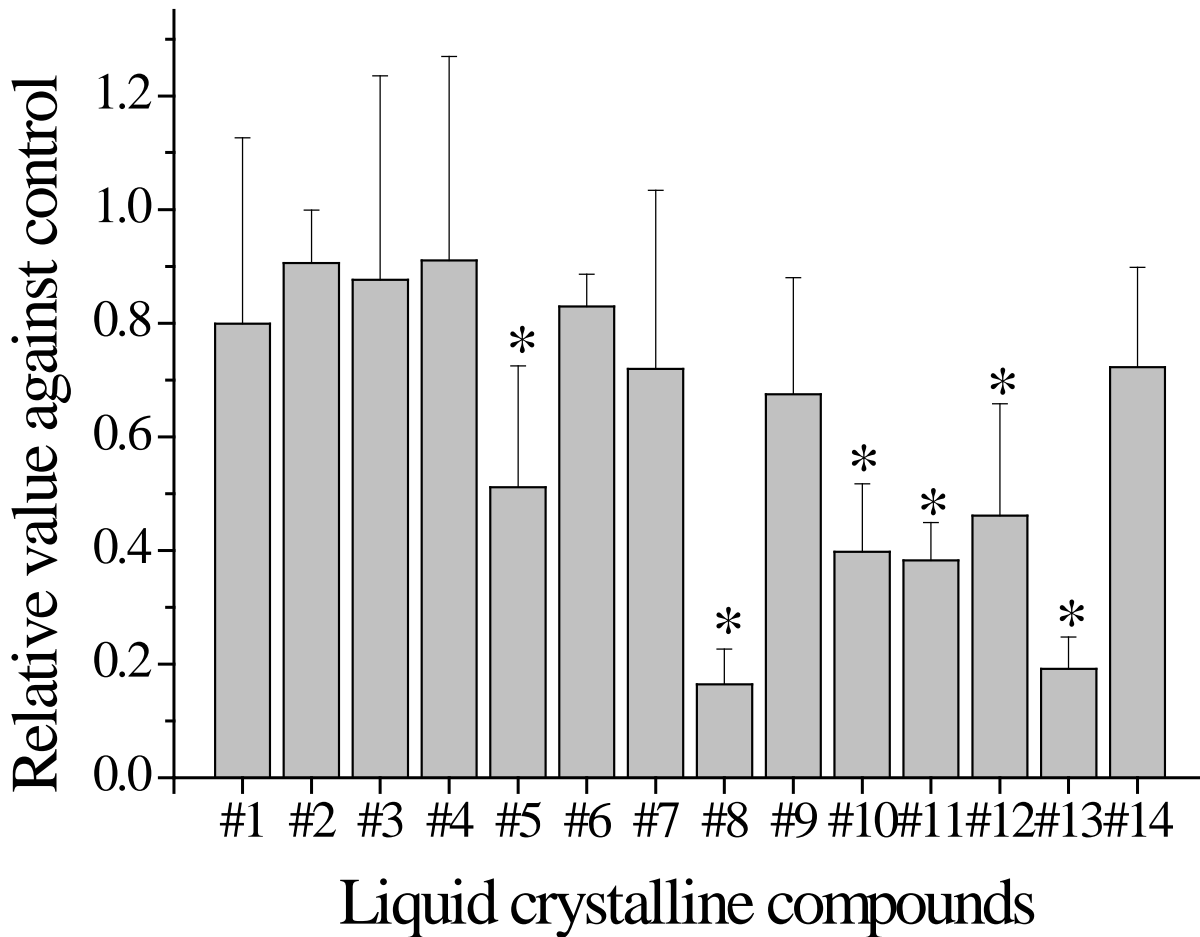

Supplement: MOESM1 [file 9540368]
